# Supplementary material for: Transcription precedes loss of Xist coating and depletion of H3K27me3 during X-chromosome reprogramming in the mouse inner cell mass
Source: Oxford University Press journal article supplement (doi:10.1242/dev.061176), 2011-04-07
Supplement: dev061176tables1.pdf [file dev061176tables1.pdf]

**Table S1. Percentage of monoallelic, biallelic and nonscorable nuclei measured by RNA FISH**

| Gene         | Stage | <i>n</i> * | Percent biallelicism<br>(nuclei per embryo;<br>mean $\pm$ s.d.) | Percent monoallelicism<br>(nuclei per embryo;<br>mean $\pm$ s.d.) | Percent nonscorable<br>(nuclei per embryo;<br>mean $\pm$ s.d.) | <i>P</i> -value <sup>†</sup><br>(difference in observed<br>nonscorable) | <i>P</i> -value <sup>‡</sup><br>(difference between<br>early and mid-stage<br>ICMs) |
|--------------|-------|------------|-----------------------------------------------------------------|-------------------------------------------------------------------|----------------------------------------------------------------|-------------------------------------------------------------------------|-------------------------------------------------------------------------------------|
| <i>Ube1x</i> | Early | 14         | 23 $\pm$ 13                                                     | 65 $\pm$ 19                                                       | 12 $\pm$ 20                                                    | 0.97                                                                    | $8.735 \times 10^{-6}$                                                              |
|              | Mid   | 7          | 47 $\pm$ 10                                                     | 39 $\pm$ 11                                                       | 11 $\pm$ 14                                                    |                                                                         |                                                                                     |
| <i>Mecp2</i> | Early | 15         | 18 $\pm$ 15                                                     | 60 $\pm$ 14                                                       | 22 $\pm$ 18                                                    | 0.94                                                                    | $1.563 \times 10^{-10}$                                                             |
|              | Mid   | 20         | 44 $\pm$ 13                                                     | 37 $\pm$ 18                                                       | 18 $\pm$ 20                                                    |                                                                         |                                                                                     |
| <i>Abcb7</i> | Early | 9          | 14 $\pm$ 12                                                     | 75 $\pm$ 8                                                        | 10 $\pm$ 7                                                     | 0.66                                                                    | $9.587 \times 10^{-10}$                                                             |
|              | Mid   | 7          | 54 $\pm$ 12                                                     | 37 $\pm$ 11                                                       | 9 $\pm$ 11                                                     |                                                                         |                                                                                     |
| <i>Rnf12</i> | Early | 8          | 7 $\pm$ 8                                                       | 75 $\pm$ 23                                                       | 16 $\pm$ 22                                                    | 0.44                                                                    | $1.825 \times 10^{-7}$                                                              |
|              | Mid   | 20         | 36 $\pm$ 23                                                     | 55 $\pm$ 27                                                       | 9 $\pm$ 15                                                     |                                                                         |                                                                                     |
| <i>Atp7a</i> | Early | 7          | 8 $\pm$ 5                                                       | 76 $\pm$ 13                                                       | 16 $\pm$ 16                                                    | 0.78                                                                    | $2.235 \times 10^{-7}$                                                              |
|              | Mid   | 10         | 36 $\pm$ 13                                                     | 44 $\pm$ 15                                                       | 20 $\pm$ 16                                                    |                                                                         |                                                                                     |

\*The number of female ICMs.

<sup>†</sup>*P* values were calculated using a binomial exact test. The null hypothesis is that for each X-linked gene analyzed, the number of nonscorable nuclei is the same between early and mid-stage ICMs. We reject the null hypothesis when *P*<0.01. In all cases examined, failure to reject the null hypothesis indicates that the number of nonscorable nuclei is not statistically different between early and mid-stage ICMs.

<sup>‡</sup>Fisher's exact test was used to calculate *P* values. The null hypothesis is that the average percentage of biallelic and monoallelic nuclei is the same between early and mid-stage ICMs. We reject the null hypothesis if *P*<0.01 indicating in all cases there is a statistically significant difference between average percentage of biallelic and monoallelic nuclei between early and mid-stage ICMs.
