# Supplementary material for: Transcription precedes loss of Xist coating and depletion of H3K27me3 during X-chromosome reprogramming in the mouse inner cell mass
Source: Oxford University Press journal article supplement (doi:10.1242/dev.061176), 2011-04-07
Supplement: dev061176tables2.pdf [file dev061176tables2.pdf]

**Table S2. Mean percentage Xp as measured by allele-specific RT-PCR**

| Gene         | Stage | n<br>(number of ICMs) | Mean percent Xp<br>% Xp = $[(Xp)/(Xp+Xm)] \times 100$ | Standard<br>deviation | P value* |
|--------------|-------|-----------------------|-------------------------------------------------------|-----------------------|----------|
| <i>Ube1x</i> | Early | 13                    | 12                                                    | 0.17                  | 0.00036  |
|              | Mid   | 12                    | 41                                                    | 0.05                  |          |
| <i>Rnf12</i> | Early | 8                     | 5                                                     | 0.10                  | 0.00013  |
|              | Mid   | 9                     | 37                                                    | 0.15                  |          |
| <i>Ddx3x</i> | Early | 3                     | 26                                                    | 0.02                  | 0.014    |
|              | Mid   | 9                     | 36                                                    | 0.08                  |          |
| <i>Pdha1</i> | Early | 7                     | 31                                                    | 0.16                  | 0.0096   |
|              | Mid   | 9                     | 52                                                    | 0.07                  |          |

\*P values were calculated using two-tailed t-tests where the null hypothesis was that for each X-linked gene analyzed the percent Xp expression was the same between early and mid ICMs. We reject the null hypothesis when  $P > 0.05$ .
